# Supplementary material
Source: PubMed Central journal article supplement (PMC10354685)
Supplement: jama-e2311313-s004.pdf [file jama-e2311313-s004.pdf]

## Data Sharing Statement

### Data

**Data available:** Yes

**Data types:** Deidentified participant data

**How to access data:** Individual participant data will be shared in data sets in a de-identified/anonymised format. Shared data will include data sets from Novo Nordisk sponsored clinical research completed after 2001 for product indications approved in both the EU and US. The study protocol and redacted clinical study report will be made available according to Novo Nordisk data sharing commitments. These data will be available after research completion and approval of product and product use in both EU and US (no end date). Data will be shared with bona fide researchers submitting a research proposal requesting access to data, for use as approved by the Independent Review Board (IRB) according to the IRB charter (see [novonordisk-trials.com](http://novonordisk-trials.com)). These data can be accessed via an access request proposal form; the access criteria can be found at [novonordisk-trials.com](http://novonordisk-trials.com). The data will be made available on a specialised SAS data platform. The results tables will be made available according to US and EU law, via [Clinicaltrials.gov](http://Clinicaltrials.gov) and EU Clinical Trials Register. Clinical trials synopsis will be uploaded to [novonordisk-trials.com](http://novonordisk-trials.com) for clinical projects that have been discontinued

**When available:** With publication

### Supporting Documents

**Document types:** None

### Additional Information

**Who can access the data:** Researchers whose proposed use of the data has been approved

**Types of analyses:** Data will be shared with bona fide researchers submitting a research proposal requesting access to data, for use as approved by the Independent Review Board (IRB) according to the IRB charter (see [novonordisk-trials.com](http://novonordisk-trials.com)).

**Mechanisms of data availability:** Individual participant data will be shared in data sets after approval of a proposal
